# Supplementary material
Source: Springer Nature journal article supplement (https://www.springermedizin.de/resource/supplementary/12889_2012_5294_MOESM1_ESM.pdf/9495040)
Supplement: MOESM1 [file 9495040]

# WHO STEPS Instrument

## (Core and Expanded)

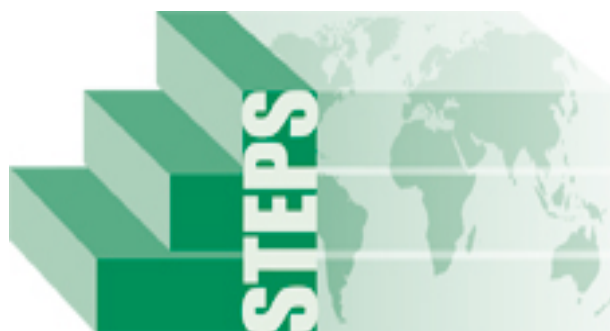

## The WHO STEPwise approach to chronic disease risk factor surveillance (STEPS)

World Health Organization  
20 Avenue Appia, 1211 Geneva 27, Switzerland

For further information: [www.who.int/chp/steps](http://www.who.int/chp/steps)

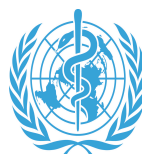

World Health  
Organization

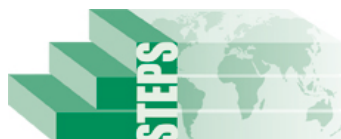

# WHO STEPS Instrument for Chronic Disease Risk Factor Surveillance

<insert country/site name>

| Survey Information |                                      |            |      |
|--------------------|--------------------------------------|------------|------|
| Location and Date  |                                      | Response   | Code |
| 1                  | Cluster/Centre/Village ID            |            | I1   |
| 2                  | Cluster/Centre/Village name          |            | I2   |
| 3                  | Interviewer ID                       |            | I3   |
| 4                  | Date of completion of the instrument | dd mm year | I4   |

| Participant Id Number                             |                                             |                                                                                      |      |
|---------------------------------------------------|---------------------------------------------|--------------------------------------------------------------------------------------|------|
| Consent, Interview Language and Name              |                                             | Response                                                                             | Code |
| 5                                                 | Consent has been read and obtained          | Yes 1<br>No 2 <b>If NO, END</b>                                                      | I5   |
| 6                                                 | Interview Language <i>[Insert Language]</i> | English 1<br><i>[Add others]</i> 2<br><i>[Add others]</i> 3<br><i>[Add others]</i> 4 | I6   |
| 7                                                 | Time of interview<br>(24 hour clock)        | hrs mins                                                                             | I7   |
| 8                                                 | Family Surname                              |                                                                                      | I8   |
| 9                                                 | First Name                                  |                                                                                      | I9   |
| <b>Additional Information that may be helpful</b> |                                             |                                                                                      |      |
| 10                                                | Contact phone number where possible         |                                                                                      | I10  |

Record and file identification information (I5 to I10) separately from the completed questionnaire.

| Step 1 Demographic Information |                                                                                                 |                                      |      |
|--------------------------------|-------------------------------------------------------------------------------------------------|--------------------------------------|------|
| CORE: Demographic Information  |                                                                                                 |                                      |      |
| Question                       | Response                                                                                        |                                      | Code |
| 11                             | Sex ( <i>Record Male / Female as observed</i> )                                                 | Male 1<br>Female 2                   | C1   |
| 12                             | What is your date of birth?<br><i>Don't Know 77 77 7777</i>                                     | dd mm year <i>If known, Go to C4</i> | C2   |
| 13                             | How old are you?                                                                                | Years                                | C3   |
| 14                             | In total, how many years have you spent at school or in full-time study (excluding pre-school)? | Years                                | C4   |

## Step 1 Behavioural Measurements

**CORE: Tobacco Use**

Now I am going to ask you some questions about various health behaviours. This includes things like smoking, drinking alcohol, eating fruits and vegetables and physical activity. Let's start with tobacco.

| Question |                                                                                                                                                      | Response                                                                                          | Code                |
|----------|------------------------------------------------------------------------------------------------------------------------------------------------------|---------------------------------------------------------------------------------------------------|---------------------|
| 22       | Do you currently smoke any <b>tobacco products</b> , such as cigarettes, cigars or pipes? ( <i>USE SHOWCARD</i> )                                    | Yes    1<br>No    2    If No, go to T6                                                            | T1                  |
| 23       | Do you currently smoke tobacco products <b>daily</b> ?                                                                                               | Yes    1<br>No    2    If No, go to T6                                                            | T2                  |
| 24       | How old were you when you <b>first started</b> smoking daily?                                                                                        | Age (years) <input type="text"/> <input type="text"/><br><i>Don't know 77</i> If Known, go to T5a | T3                  |
| 25       | Do you remember how long ago it was?<br><br>( <i>RECORD ONLY 1, NOT ALL 3</i> )<br><br><i>Don't know 77</i>                                          | In Years <input type="text"/> <input type="text"/> If Known, go to T5a                            | T4a                 |
|          |                                                                                                                                                      | OR    in Months <input type="text"/> <input type="text"/> If Known, go to T5a                     | T4b                 |
|          |                                                                                                                                                      | OR    in Weeks <input type="text"/> <input type="text"/>                                          | T4c                 |
| 26       | On average, <b>how many</b> of the following do you smoke each day?<br><br>( <i>RECORD FOR EACH TYPE, USE SHOWCARD</i> )<br><br><i>Don't Know 77</i> | Manufactured cigarettes <input type="text"/> <input type="text"/>                                 | T5a                 |
|          |                                                                                                                                                      | Hand-rolled cigarettes <input type="text"/> <input type="text"/>                                  | T5b                 |
|          |                                                                                                                                                      | Pipes full of tobacco <input type="text"/> <input type="text"/>                                   | T5c                 |
|          |                                                                                                                                                      | Cigars, cheroots, cigarillos <input type="text"/> <input type="text"/>                            | T5d                 |
|          |                                                                                                                                                      | Other <input type="text"/> <input type="text"/> If Other, go to T5other,<br>else go to T9         | T5e                 |
|          |                                                                                                                                                      | Other (please specify): <input type="text"/>                                                      | T5other<br>Go to T9 |

**CORE: Alcohol Consumption**

The next questions ask about the consumption of alcohol.

| Question |                                                                                                                                                                             | Response                                                                                                  | Code |
|----------|-----------------------------------------------------------------------------------------------------------------------------------------------------------------------------|-----------------------------------------------------------------------------------------------------------|------|
| 36       | Have you <b>ever</b> consumed an alcoholic drink such as beer, wine, spirits, fermented cider or <i>[add other local examples]</i> ?<br>(USE SHOWCARD OR SHOW EXAMPLES)     | Yes 1<br>No 2 If No, go to D1                                                                             | A1a  |
| 37       | Have you consumed an alcoholic drink within the <b>past 12 months</b> ?                                                                                                     | Yes 1<br>No 2 If No, go to D1                                                                             | A1b  |
| 38       | During the past 12 months, <b>how frequently</b> have you had at least one alcoholic drink?<br><br>(READ RESPONSES, USE SHOWCARD)                                           | Daily 1<br>5-6 days per week 2<br>1-4 days per week 3<br>1-3 days per month 4<br>Less than once a month 5 | A2   |
| 39       | Have you consumed an alcoholic drink within the <b>past 30 days</b> ?                                                                                                       | Yes 1<br>No 2 If No, go to D1                                                                             | A3   |
| 40       | During the past 30 days, on how many <b>occasions</b> did you have at least one alcoholic drink?                                                                            | Number<br>Don't know 77                                                                                   | A4   |
| 41       | During the past 30 days, when you drank alcohol, <b>on average</b> , how many <b>standard alcoholic drinks</b> did you have during one drinking occasion?<br>(USE SHOWCARD) | Number<br>Don't know 77                                                                                   | A5   |

|    |                                                                                                                                                                              |                                                       |    |
|----|------------------------------------------------------------------------------------------------------------------------------------------------------------------------------|-------------------------------------------------------|----|
| 42 | During the past 30 days, what was the <b>largest number</b> of standard alcoholic drinks you had on a single occasion, counting all types of alcoholic drinks together?      | Largest number<br>Don't Know 77 <input type="text"/>  | A6 |
| 43 | During the past 30 days, how many times did you have for <b>men: five or more</b><br>for <b>women: four or more</b> standard alcoholic drinks in a single drinking occasion? | Number of times<br>Don't Know 77 <input type="text"/> | A7 |

## CORE: Physical Activity

Next I am going to ask you about the time you spend doing different types of physical activity in a typical week. Please answer these questions even if you do not consider yourself to be a physically active person.

Think first about the time you spend doing work. Think of work as the things that you have to do such as paid or unpaid work, study/training, household chores, harvesting food/crops, fishing or hunting for food, seeking employment. *[Insert other examples if needed]*. In answering the following questions 'vigorous-intensity activities' are activities that require hard physical effort and cause large increases in breathing or heart rate, 'moderate-intensity activities' are activities that require moderate physical effort and cause small increases in breathing or heart rate.

| Question                                                                                                                                                                                                                                                                                  | Response                                                                                                                                                                                                                                                               | Code                                                                                |
|-------------------------------------------------------------------------------------------------------------------------------------------------------------------------------------------------------------------------------------------------------------------------------------------|------------------------------------------------------------------------------------------------------------------------------------------------------------------------------------------------------------------------------------------------------------------------|-------------------------------------------------------------------------------------|
| <b>Work</b>                                                                                                                                                                                                                                                                               |                                                                                                                                                                                                                                                                        |                                                                                     |
| 52                                                                                                                                                                                                                                                                                        | Does your work involve vigorous-intensity activity that causes large increases in breathing or heart rate like <i>[carrying or lifting heavy loads, digging or construction work]</i> for at least 10 minutes continuously?<br><i>[INSERT EXAMPLES] (USE SHOWCARD)</i> | Yes 1<br>No 2 <i>If No, go to P 4</i><br>P1                                         |
| 53                                                                                                                                                                                                                                                                                        | In a typical week, on how many days do you do vigorous-intensity activities as part of your work?                                                                                                                                                                      | Number of days <input type="text"/><br>P2                                           |
| 54                                                                                                                                                                                                                                                                                        | How much time do you spend doing vigorous-intensity activities at work on a typical day?                                                                                                                                                                               | Hours : minutes <input type="text"/> : <input type="text"/><br>hrs mins<br>P3 (a-b) |
| 55                                                                                                                                                                                                                                                                                        | Does your work involve moderate-intensity activity, that causes small increases in breathing or heart rate such as brisk walking <i>[or carrying light loads]</i> for at least 10 minutes continuously?<br><i>[INSERT EXAMPLES] (USE SHOWCARD)</i>                     | Yes 1<br>No 2 <i>If No, go to P 7</i><br>P4                                         |
| 56                                                                                                                                                                                                                                                                                        | In a typical week, on how many days do you do moderate-intensity activities as part of your work?                                                                                                                                                                      | Number of days <input type="text"/><br>P5                                           |
| 57                                                                                                                                                                                                                                                                                        | How much time do you spend doing moderate-intensity activities at work on a typical day?                                                                                                                                                                               | Hours : minutes <input type="text"/> : <input type="text"/><br>hrs mins<br>P6 (a-b) |
| <b>Travel to and from places</b>                                                                                                                                                                                                                                                          |                                                                                                                                                                                                                                                                        |                                                                                     |
| The next questions exclude the physical activities at work that you have already mentioned.<br>Now I would like to ask you about the usual way you travel to and from places. For example to work, for shopping, to market, to place of worship. <i>[Insert other examples if needed]</i> |                                                                                                                                                                                                                                                                        |                                                                                     |
| 58                                                                                                                                                                                                                                                                                        | Do you walk or use a bicycle ( <i>pedal cycle</i> ) for at least 10 minutes continuously to get to and from places?                                                                                                                                                    | Yes 1<br>No 2 <i>If No, go to P 10</i><br>P7                                        |
| 59                                                                                                                                                                                                                                                                                        | In a typical week, on how many days do you walk or bicycle for at least 10 minutes continuously to get to and from places?                                                                                                                                             | Number of days <input type="text"/><br>P8                                           |
| 60                                                                                                                                                                                                                                                                                        | How much time do you spend walking or bicycling for travel on a typical day?                                                                                                                                                                                           | Hours : minutes <input type="text"/> : <input type="text"/><br>hrs mins<br>P9 (a-b) |

| CORE: Physical Activity, Continued                                                                                                                                                                                         |                                                                                                                                                                                                                                                                                             |                                                                                            |              |
|----------------------------------------------------------------------------------------------------------------------------------------------------------------------------------------------------------------------------|---------------------------------------------------------------------------------------------------------------------------------------------------------------------------------------------------------------------------------------------------------------------------------------------|--------------------------------------------------------------------------------------------|--------------|
| Question                                                                                                                                                                                                                   |                                                                                                                                                                                                                                                                                             | Response                                                                                   | Code         |
| <b>Recreational activities</b>                                                                                                                                                                                             |                                                                                                                                                                                                                                                                                             |                                                                                            |              |
| The next questions exclude the work and transport activities that you have already mentioned.<br>Now I would like to ask you about sports, fitness and recreational activities (leisure), <i>[Insert relevant terms]</i> . |                                                                                                                                                                                                                                                                                             |                                                                                            |              |
| 61                                                                                                                                                                                                                         | Do you do any vigorous-intensity sports, fitness or recreational (leisure) activities that cause large increases in breathing or heart rate like <i>[running or football]</i> for at least 10 minutes continuously?<br><i>[INSERT EXAMPLES] (USE SHOWCARD)</i>                              | Yes 1<br><br>No 2 <i>If No, go to P 13</i>                                                 | P10          |
| 62                                                                                                                                                                                                                         | In a typical week, on how many days do you do vigorous-intensity sports, fitness or recreational (leisure) activities?                                                                                                                                                                      | Number of days<br><input type="text"/>                                                     | P11          |
| 63                                                                                                                                                                                                                         | How much time do you spend doing vigorous-intensity sports, fitness or recreational activities on a typical day?                                                                                                                                                                            | Hours : minutes <input type="text"/> : <input type="text"/><br>hrs                    mins | P12<br>(a-b) |
| 64                                                                                                                                                                                                                         | Do you do any moderate-intensity sports, fitness or recreational (leisure) activities that cause a small increase in breathing or heart rate such as brisk walking, <i>[cycling, swimming, volleyball]</i> for at least 10 minutes continuously?<br><i>[INSERT EXAMPLES] (USE SHOWCARD)</i> | Yes 1<br><br>No 2 <i>If No, go to P16</i>                                                  | P13          |
| 65                                                                                                                                                                                                                         | In a typical week, on how many days do you do moderate-intensity sports, fitness or recreational (leisure) activities?                                                                                                                                                                      | Number of days<br><input type="text"/>                                                     | P14          |
| 66                                                                                                                                                                                                                         | How much time do you spend doing moderate-intensity sports, fitness or recreational (leisure) activities on a typical day?                                                                                                                                                                  | Hours : minutes <input type="text"/> : <input type="text"/><br>hrs                    mins | P15<br>(a-b) |

| EXPANDED: Physical Activity                                                                                                                                                                                                                                                                                                                      |                                                                           |                                                                                            |              |
|--------------------------------------------------------------------------------------------------------------------------------------------------------------------------------------------------------------------------------------------------------------------------------------------------------------------------------------------------|---------------------------------------------------------------------------|--------------------------------------------------------------------------------------------|--------------|
| <b>Sedentary behaviour</b>                                                                                                                                                                                                                                                                                                                       |                                                                           |                                                                                            |              |
| The following question is about sitting or reclining at work, at home, getting to and from places, or with friends including time spent sitting at a desk, sitting with friends, traveling in car, bus, train, reading, playing cards or watching television, but do not include time spent sleeping.<br><i>[INSERT EXAMPLES] (USE SHOWCARD)</i> |                                                                           |                                                                                            |              |
| 67                                                                                                                                                                                                                                                                                                                                               | How much time do you usually spend sitting or reclining on a typical day? | Hours : minutes <input type="text"/> : <input type="text"/><br>hrs                    mins | P16<br>(a-b) |

| CORE: History of Raised Blood Pressure |                                                                                                                 |                                          |      |
|----------------------------------------|-----------------------------------------------------------------------------------------------------------------|------------------------------------------|------|
| Question                               |                                                                                                                 | Response                                 | Code |
| 68                                     | Have you ever had your blood pressure measured by a doctor or other health worker?                              | Yes 1<br><br>No 2 <i>If No, go to H6</i> | H1   |
| 69                                     | Have you ever been told by a doctor or other health worker that you have raised blood pressure or hypertension? | Yes 1<br><br>No 2 <i>If No, go to H6</i> | H2a  |
| 70                                     | Have you been told in the past 12 months?                                                                       | Yes 1<br><br>No 2                        | H2b  |

| EXPANDED: History of Raised Blood Pressure |                                                                                                                                           |                                      |      |
|--------------------------------------------|-------------------------------------------------------------------------------------------------------------------------------------------|--------------------------------------|------|
| 71                                         | Are you currently receiving any of the following treatments/advice for high blood pressure prescribed by a doctor or other health worker? |                                      |      |
|                                            | Drugs (medication) that you have taken in the past two weeks                                                                              | Yes 1<br>No 2                        | H3a  |
|                                            | Advice to reduce salt intake                                                                                                              | Yes 1<br>No 2                        | H3b  |
|                                            | Advice or treatment to lose weight                                                                                                        | Yes 1<br>No 2                        | H3c  |
|                                            | Advice or treatment to stop smoking                                                                                                       | Yes 1<br>No 2                        | H3d  |
|                                            | Advice to start or do more exercise                                                                                                       | Yes 1<br>No 2                        | H3e  |
| 72                                         | Have you ever seen a traditional healer for raised blood pressure or hypertension?                                                        | Yes 1<br>No 2                        | H4   |
| 73                                         | Are you currently taking any herbal or traditional remedy for your raised blood pressure?                                                 | Yes 1<br>No 2                        | H5   |
| CORE: History of Diabetes                  |                                                                                                                                           |                                      |      |
| Question                                   |                                                                                                                                           | Response                             | Code |
| 74                                         | Have you ever had your blood sugar measured by a doctor or other health worker?                                                           | Yes 1<br>No 2 <i>If No, go to M1</i> | H6   |
| 75                                         | Have you ever been told by a doctor or other health worker that you have raised blood sugar or diabetes?                                  | Yes 1<br>No 2 <i>If No, go to M1</i> | H7a  |
| 76                                         | Have you been told in the past 12 months?                                                                                                 | Yes 1<br>No 2                        | H7b  |
| EXPANDED: History of Diabetes              |                                                                                                                                           |                                      |      |
| 77                                         | Are you currently receiving any of the following treatments/advice for diabetes prescribed by a doctor or other health worker?            |                                      |      |
|                                            | Insulin                                                                                                                                   | Yes 1<br>No 2                        | H8a  |
|                                            | Drugs (medication) that you have taken in the past two weeks                                                                              | Yes 1<br>No 2                        | H8b  |
|                                            | Special prescribed diet                                                                                                                   | Yes 1<br>No 2                        | H8c  |
|                                            | Advice or treatment to lose weight                                                                                                        | Yes 1<br>No 2                        | H8d  |
|                                            | Advice or treatment to stop smoking                                                                                                       | Yes 1<br>No 2                        | H8e  |
| 78                                         | Have you ever seen a traditional healer for diabetes or raised blood sugar?                                                               | Yes 1<br>No 2                        | H9   |
|                                            |                                                                                                                                           |                                      |      |
| 79                                         | Are you currently taking any herbal or traditional remedy for your diabetes?                                                              | Yes 1<br>No 2                        | H10  |

## Step 2 Physical Measurements

| CORE: Height and Weight |                                                                                                                                                   |                                        |            |
|-------------------------|---------------------------------------------------------------------------------------------------------------------------------------------------|----------------------------------------|------------|
| Question                |                                                                                                                                                   | Response                               | Code       |
| 80                      | Interviewer ID                                                                                                                                    | □□□□□□                                 | M1         |
| 81                      | Device IDs for height and weight                                                                                                                  | Height □□□□<br>Weight □□□□             | M2a<br>M2b |
| 82                      | Height                                                                                                                                            | in Centimetres (cm) □□□□□□.□□          | M3         |
| 83                      | Weight<br><i>If too large for scale 666.6</i>                                                                                                     | in Kilograms (kg) □□□□□□.□□            | M4         |
| 84                      | <b>For women:</b> Are you pregnant?                                                                                                               | Yes 1 <i>If Yes, go to M 8</i><br>No 2 | M5         |
| CORE: Waist             |                                                                                                                                                   |                                        |            |
| 85                      | Device ID for waist                                                                                                                               | □□□□                                   | M6         |
| 86                      | Waist circumference                                                                                                                               | in Centimetres (cm) □□□□□□.□□          | M7         |
| CORE: Blood Pressure    |                                                                                                                                                   |                                        |            |
| 87                      | Interviewer ID                                                                                                                                    | □□□□□□                                 | M8         |
| 88                      | Device ID for blood pressure                                                                                                                      | □□□□                                   | M9         |
| 89                      | Cuff size used                                                                                                                                    | Small 1<br>Medium 2<br>Large 3         | M10        |
| 90                      | Reading 1                                                                                                                                         | Systolic ( mmHg) □□□□□□                | M11a       |
|                         |                                                                                                                                                   | Diastolic (mmHg) □□□□□□                | M11b       |
| 91                      | Reading 2                                                                                                                                         | Systolic ( mmHg) □□□□□□                | M12a       |
|                         |                                                                                                                                                   | Diastolic (mmHg) □□□□□□                | M12b       |
| 92                      | Reading 3                                                                                                                                         | Systolic ( mmHg) □□□□□□                | M13a       |
|                         |                                                                                                                                                   | Diastolic (mmHg) □□□□□□                | M13b       |
| 93                      | During the past two weeks, have you been treated for raised blood pressure with drugs (medication) prescribed by a doctor or other health worker? | Yes 1<br>No 2                          | M14        |

| EXPANDED: Hip Circumference and Heart Rate |                   |                               |      |
|--------------------------------------------|-------------------|-------------------------------|------|
| 94                                         | Hip circumference | in Centimeters (cm) □□□□□□.□□ | M15  |
| 95                                         | Heart Rate        |                               |      |
|                                            | Reading 1         | Beats per minute □□□□□□       | M16a |
|                                            | Reading 2         | Beats per minute □□□□□□       | M16b |
|                                            | Reading 3         | Beats per minute □□□□□□       | M16c |

## Step 3 Biochemical Measurements

| CORE: Blood Glucose                         |                                                                                                                                                  |                                         |      |
|---------------------------------------------|--------------------------------------------------------------------------------------------------------------------------------------------------|-----------------------------------------|------|
| Question                                    |                                                                                                                                                  | Response                                | Code |
| 96                                          | During the past 12 hours have you had anything to eat or drink, other than water?                                                                | Yes 1<br>No 2                           | B1   |
| 97                                          | Technician ID                                                                                                                                    | □□□□□□                                  | B2   |
| 98                                          | Device ID                                                                                                                                        | □□□□                                    | B3   |
| 99                                          | Time of day blood specimen taken (24 hour clock)                                                                                                 | Hours : minutes □□□□ : □□□□<br>hrs mins | B4   |
| 100                                         | Fasting blood glucose<br>Choose accordingly: mmol/l or mg/dl                                                                                     | mmol/l □□□□, □□□□                       | B5   |
|                                             |                                                                                                                                                  | mg/dl □□□□□□,□□□                        |      |
| 101                                         | Today, have you taken insulin or other drugs (medication) that have been prescribed by a doctor or other health worker for raised blood glucose? | Yes 1<br>No 2                           | B6   |
| CORE: Blood Lipids                          |                                                                                                                                                  |                                         |      |
| 102                                         | Device ID                                                                                                                                        | □□□□                                    | B7   |
| 103                                         | Total cholesterol<br>Choose accordingly: mmol/l or mg/dl                                                                                         | mmol/l □□□□, □□□□                       | B8   |
|                                             |                                                                                                                                                  | mg/dl □□□□□□,□□□                        |      |
| 104                                         | During the past two weeks, have you been treated for raised cholesterol with drugs (medication) prescribed by a doctor or other health worker?   | Yes 1<br>No 2                           | B9   |
| EXPANDED: Triglycerides and HDL Cholesterol |                                                                                                                                                  |                                         |      |
| 105                                         | Triglycerides<br>Choose accordingly: mmol/l or mg/dl                                                                                             | mmol/l □□□□, □□□□                       | B10  |
|                                             |                                                                                                                                                  | mg/dl □□□□□□,□□□                        |      |
| 106                                         | HDL Cholesterol<br>Choose accordingly: mmol/l or mg/dl                                                                                           | mmol/l □□, □□□□                         | B11  |
|                                             |                                                                                                                                                  | mg/dl □□□□□□,□□□                        |      |
| EXPANDED: High Sensitivity CRP              |                                                                                                                                                  |                                         |      |
| 107                                         | Hs CRP<br>Choose accordingly: mmol/l or mg/dl                                                                                                    | mmol/l □□□□, □□□□                       | B12  |
|                                             |                                                                                                                                                  | mg/dl □□□□□□,□□□                        |      |
|                                             |                                                                                                                                                  |                                         |      |
|                                             |                                                                                                                                                  |                                         |      |
